# Supplementary material for: Direct measurement forest carbon protocol: a commercial system-of-systems to incentivize forest restoration and management
Source: PeerJ. 2020 Apr 27;8:e8891. doi: 10.7717/peerj.8891 (PMC7192159; doi:10.7717/peerj.8891)
Supplement: Supplemental Information 2 — The raw data for annual NEE (tCO2eq acre-1 yr-1) is provided for the Harvard Forest (HF) (US-Ha1) and the Ankasa Park (AP) (GH-Ak1) sites analyzed in this study. [file peerj-08-8891-s002.xlsx]

## Sheet: Sheet1
	Supplement S1. Raw Data for Harvard Forest and Ankaasa Park Sites
	Year	Harvard Forest (HF) (US-Ha1) NEE (tCO2eq acre-1 yr-1)	Ankasa Park (AP) (GH-Ank) NEE (tCO2eq acre-1 yr-1)
	1992	-2.4332
	1993	-2.65419
	1994	-2.56355
	1995	-4.18577
	1996	-2.88657
	1997	-2.41956
	1998	-2.32839
	1999	-3.16889
	2000	-3.87125
	2001	-6.32485
	2002	-4.00794
	2003	-3.15434
	2004	-6.80208
	2005	-8.0687
	2006	-6.8005
	2007	-7.97195
	2008	-9.09214
	2009	-5.31681
	2010	-0.53135
	2011	-2.22954	-15.1962
	2012	-5.0403	-9.16993
	2013	-3.23954	-6.74209
	2014	-6.82105	-9.83627
	2015	-2.8814
	2016	-6.43656
